1 Missing the point (estimate): Bayesian and likelihood phylogenetic  
2 reconstructions of morphological characters produce generally  
3 concordant inferences. A comment on Puttick *et al.* (2017)

4 Joseph W. Brown<sup>1\*</sup>, Caroline Parins-Fukuchi<sup>1\*</sup>, Gregory W. Stull<sup>1</sup>, Oscar M. Vargas<sup>1</sup>, and  
5 Stephen A. Smith<sup>1</sup>

6 <sup>1</sup>Department of Ecology and Evolutionary Biology, University of Michigan, Ann Arbor,  
7 Michigan 48109, USA

8 \*Equal authorship. Emails: josephwb@umich.edu, cfukuchi@umich.edu

9 **Abstract**

10 Puttick *et al.* (2017) performed a simulation study to compare accuracy between methods  
11 inferring phylogeny from discrete morphological characters. They report that a Bayesian  
12 implementation of the Mk model (Lewis, 2001) was most accurate (but with low resolution),  
13 while a maximum likelihood (ML) implementation of the same model was least accurate. They  
14 conclude by strongly advocating that Bayesian implementations of the Mk model should be the  
15 default method of analysis for such data. While we applaud investigations into accuracy and  
16 alternative methods of analysis, this conclusion is based on an inappropriate comparison of the  
17 ML point estimate with the Bayesian consensus. We revisit these issues through simulation by  
18 considering uncertainty in ML reconstructions, and demonstrate that Bayesian and ML estimates  
19 are generally concordant when conventional edge support thresholds are considered. We therefore  
20 disagree with the conclusions of Puttick *et al.* (2017), and consider their prescription of *any*  
21 default method to be unfounded. Instead, we recommend caution and thoughtful consideration of  
22 the model or method being applied to a morphological dataset.

23 **Key words:** phylogeny, morphology, paleontology, Bayesian, likelihood

24 **Comparing point estimates to consensus summaries**

25 Puttick *et al.* (2017) report that ML tree inference under the Mk model results in higher  
26 topological error than Bayesian implementations. However, this result is driven precisely by the  
27 comparison of maximum likelihood point estimates (MLE) to Bayesian majority-rule (BMR)  
28 consensus trees. MLE topologies are fully resolved, but this stems from the standard binary tree  
29 searching algorithms employed and not from an explicit statistical rejection of unresolved nodes.  
30 Therefore, individual MLE estimates may contain edges with negligible statistical support. On  
31 the other hand, consensus summaries, independent of phylogenetic method, may have reduced

32 resolution as a product of uncertainty arising by summarization across conflicting sampled  
33 topologies. Thus, a direct comparison between a consensus tree (i.e., BMR) and a point estimate  
34 (i.e., MLE) is inappropriate. BMR topologies of Puttick *et al.* (2017) are more accurate because  
35 poorly supported conflicted edges were collapsed, while MLE topologies were fully resolved,  
36 even if poorly supported. While contrasting MLE and Bayesian maximum *a posteriori* (MAP)  
37 trees would be a more appropriate comparison of optimal point estimates, the incorporation of  
38 uncertainty is an integral part of all phylogenetic analysis. Therefore, comparison of consensus  
39 trees from Bayesian and ML analyses hold more practical utility for systematists. For these  
40 reasons, we argue that the results of Puttick *et al.* (2017) are an artifact of their comparison  
41 between fundamentally incomparable sets of trees.

## 42 **Support metrics are available for morphological characters**

43 To avoid drawing untenable conclusions, it is *de rigueur* of any phylogenetic analysis to explicitly  
44 assess edge support. Systematists often accomplish this via non-parametric bootstrap sampling  
45 (Felsenstein, 1985), though other measures exist (see below). Puttick *et al.* (2017) did not assess  
46 edge support in their ML estimates, stating that morphological (but not genetic) data do not meet  
47 an underlying assumption of the bootstrap statistical procedure that phylogenetic signal is  
48 distributed randomly among characters. The authors do not explain the meaning of this statement,  
49 and no references are provided to support the assertion. Non-parametric bootstrapping has been a  
50 staple of phylogenetic reconstruction for decades, including for the analysis of discrete  
51 morphological characters. Bootstrapping works via the assumption that the observed characters  
52 are a representative sample from a population of possible characters evolving under the same  
53 process, and thus can be resampled to assess confidence in parameters (Felsenstein, 1985). While  
54 morphological matrices typically include only variable characters (i.e., an ascertainment bias),  
55 this is an informative subset of the possible characters, and should not be thought of as misleading  
56 calculations. Were this otherwise, the original sample would be likewise suspect, as the use of  
57 model-based phylogenetic inference (such as Mk) explicitly assumes characters evolve according  
58 to the same process. Concerns about the interpretation and use of the bootstrap exist (Sanderson,  
59 1995), the primary of which involves the assumption that individual characters are statistically  
60 independent. However, it is reasonable to assume that individual sites in a morphological matrix  
61 would be more independent than adjacent sites from the same gene, and genetic datasets are  
62 routinely bootstrapped. We therefore disagree with the claims of Puttick *et al.* (2017) that  
63 bootstrapping is inappropriate for morphological data, or at least any *more* inappropriate than for  
64 genetic data.

65 There are also other methods researchers can use to assess edge support in a likelihood  
66 framework. Jackknifing, unlike bootstrapping, samples without replacement, conditioning on  
67 strict subsets of the observed data. More recently, the SH-like test (Guindon *et al.*, 2010)  
68 computes support for each internal edge in the MLE tree by considering all nearest neighbour  
69 interchanges (NNIs). This test is implemented in several software packages including RAxML  
70 (Stamatakis, 2014), one of the programs used by Puttick *et al.* (2017). Alternatively, ML  
71 programs frequently offer an option to collapse edges on a MLE tree that fall below some  
72 minimum threshold length. Use of any of these options would enable a fairer comparison of  
73 likelihood and Bayesian reconstructions.

## 74 **ML and Bayesian comparisons incorporating uncertainty**

75 To measure the effect of comparing BMR and MLE trees, we used the simulation code from  
76 Puttick *et al.* (2017) to generate 1000 character matrices, each of 100 characters on a fully  
77 pectinate tree of 32 taxa, as these settings generated the most discordant results in Puttick *et al.*  
78 (2017). Each matrix was analyzed in both Bayesian and ML frameworks using the Mk+G model  
79 (Lewis, 2001). Bayesian reconstructions were performed using MrBayes v3.2.6 (Ronquist *et al.*,  
80 2012), using the same settings as Puttick *et al.* (2017): 2 runs, each with  $5 \times 10^5$  generations,  
81 sampling every 50 generations, and discarding the first 25% samples as burnin. As in Puttick  
82 *et al.* (2017), we summarized each analysis with a BMR consensus tree (i.e. only edges with  $\geq$   
83 0.5 posterior probability are represented). Likelihood analyses were performed in RAxML v8.2.9  
84 (Stamatakis, 2014). For each simulated matrix we inferred both the MLE tree and 200  
85 nonparametric bootstrap trees. Accuracy in topological reconstruction was assessed using the  
86 Robinson-Foulds (RF) distance (Robinson and Foulds, 1981), which counts the number of  
87 unshared bipartitions between trees. We measured the following distances from the true simulated  
88 tree:  $d_{\text{BMR}}$ , the distance to the Bayesian majority-rule consensus;  $d_{\text{MLE}}$ , the distance to the MLE  
89 tree;  $d_{\text{ML50}}$ , the distance to the MLE tree which has had all edges with  $<50\%$  bootstrap support  
90 collapsed. Finally, for each matrix we calculate  $D_{\text{MLE}} = d_{\text{MLE}} - d_{\text{BMR}}$ , and  $D_{\text{ML50}} = d_{\text{ML50}} - d_{\text{BMR}}$ .  
91 These paired distances measure the relative efficacy of ML and Bayesian reconstructions: values  
92 of  $D$  greater than 0 indicate that ML produces less accurate estimates (that is, with a greater RF  
93 distance from the true generating tree).

94 As demonstrated by Puttick *et al.* (2017), MLE trees are indeed less accurate than BMR trees  
95 (Figure 1;  $D_{\text{MLE}}$ ), with MLE trees on average having an RF distance 17.6 units greater than the  
96 analogous Bayesian consensus distance. However, when collapsing MLE edges with less than  
97 50% bootstrap support, Bayesian and ML differences are normally distributed around 0 (Figure 1;  
98  $D_{\text{ML50}}$ ), indicating that when standardizing the degree of uncertainty in tree summaries there is no  
99 difference in topology reconstruction accuracy. These results support the argument that the  
100 original comparisons made in Puttick *et al.* (2017) of MLE and BMR trees are inappropriate.  
101 Depending on the level of uncertainty involved, an optimal point estimate from a distribution  
102 (e.g., MLE or MAP) may be arbitrarily distant from a summary of the same distribution. And so,  
103 the differences in MLE vs. BMR are not expected to be consistent.

## 104 **The expected concordance of Bayesian and ML results**

105 Our results reveal much greater congruence between Bayesian and ML estimates than suggested  
106 by Puttick *et al.* (2017). This is to be expected. ML and Bayesian tree construction methods  
107 should yield similar results under the conditions in which they are often employed. While  
108 Bayesian tree reconstruction differs from ML by incorporating prior distributions, the methods  
109 share likelihood functions. In phylogenetics, researchers typically adopt non-informative priors,  
110 with a few exceptions (e.g., priors on divergence time parameters). Arguments can be made for  
111 pseudo-Bayesian approaches when care is taken to ensure that priors used are truly uninformative,  
112 which result in posterior probabilities that mirror the likelihood and are therefore congruent with  
113 ML (Alfaro and Holder 2006; Gelman *et al.* 2014). If prior distributions are formulated  
114 thoughtfully, as with Wright *et al.* (2016), in shaping the Mk model using hyperpriors to  
115 accommodate character change heterogeneity, Bayesian methods can outperform ML.

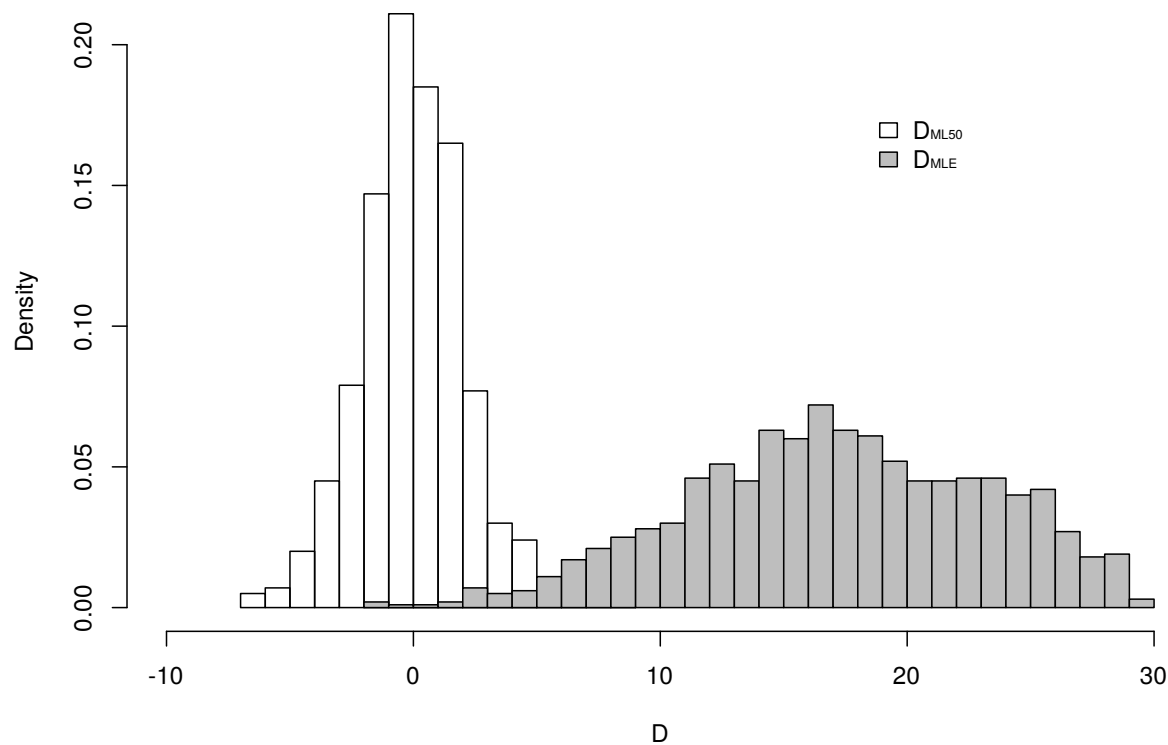

Figure 1: Topological accuracy of ML vs. Bayesian reconstructions.  $D$  measures how much larger ML distances are from the true tree ( $d_{ML}$ ) than are Bayesian distances ( $d_{BMR}$ ). MLE trees are indeed less accurate than BMRs ( $D_{MLE}$ ), but when conventional bootstrap thresholds are employed ( $D_{ML50}$ ) the difference in efficacy disappears.

116 Alternatively, inappropriate priors can positively mislead (Gelman *et al.*, 2014). Generally, when  
117 informative prior distributions are known or can be estimated using hierarchical approaches,  
118 Bayesian reconstruction methods may be strongly favored over ML. It is unclear whether Puttick  
119 *et al.* (2017) intend to draw the comparisons discussed above as they do not describe any reasons  
120 to prefer Bayesian over ML in principle.

121 Although our results demonstrate general concordance between ML and Bayesian approaches  
122 when uncertainty is represented, further simulation work is needed to determine the extent and  
123 conditions of this concordance. Issues surrounding the application of Bayesian methods are  
124 particularly important in paleontology, where researchers often conduct inference upon very  
125 limited data. In these cases, it may be desirable to construct informative prior distributions when  
126 conducting Bayesian analyses (Gelman *et al.*, 2014). The questions posed by Puttick *et al.* (2017)  
127 are critically important as statistical morphological phylogenetics moves forward. However, their  
128 inappropriate comparison between ML and Bayesian approaches leaves the relative performance  
129 of the two implementations of the Mk model unresolved.

130 We conclude by stating that we are not advocating one method over another for morphological

131 phylogenetic reconstruction. Methods differ in model (Mk vs. parsimony), inferential paradigm  
132 (parsimony vs. ML/Bayesian), assumptions (prior distributions, model adequacy), interpretation,  
133 and means to incorporate uncertainty (ML/parsimony vs. Bayesian). We therefore recommend  
134 caution and thoughtful consideration of the biological question being addressed and then  
135 choosing the method that will best address that question. All inferential approaches possess  
136 strengths and weaknesses, and it is the task of researchers to determine the most appropriate given  
137 available data and the questions under investigation. The excitement of new morphological data  
138 sources and new means for analyzing these data should not overshadow the obligation to apply  
139 methods thoughtfully.

## 140 **Authors' contributions**

141 J.W.B. conceived the design of the study and performed the analyses; J.W.B. and C.F.-P. drafted  
142 the manuscript; all authors contributed to the interpretation of results and the writing of the  
143 manuscript.

## 144 **Acknowledgements**

145 We thank Mark Puttick for sharing datasets and thoughts on bootstrap resampling. We thank  
146 members of the Smith laboratory for thoughtful discussions on an earlier draft of this manuscript.  
147 J.W.B. and C.F.-P. thank Annika Hansen for being a stalwart leading example of objective  
148 criticism. This is paper #1 of the PRUSSIA working group at UM.

## 149 **References**

- 150 Alfaro, M. E. and Holder, M. T. 2006. The posterior and the prior in Bayesian phylogenetics.  
151 *Annual Review of Ecology, Evolution, and Systematics*, 37: 19–42.
- 152 Felsenstein, J. 1985. Confidence limits on phylogenies: an approach using the bootstrap.  
153 *Evolution*, 39(4): 783–791.
- 154 Gelman, A., Carlin, J. B., Stern, H. S., and Rubin, D. B. 2014. *Bayesian Data Analysis*, volume 2.  
155 Chapman & Hall/CRC Boca Raton, FL, USA.
- 156 Guindon, S., Dufayard, J.-F., Lefort, V., Anisimova, M., Hordijk, W., and Gascuel, O. 2010. New  
157 algorithms and methods to estimate maximum-likelihood phylogenies: assessing the  
158 performance of phyml 3.0. *Systematic Biology*, 59(3): 307–321.
- 159 Lewis, P. O. 2001. A likelihood approach to estimating phylogeny from discrete morphological  
160 character data. *Systematic Biology*, 50(6): 913–925.
- 161 Puttick, M. N., O'Reilly, J. E., Tanner, A. R., Fleming, J. F., Clark, J., Holloway, L.,  
162 Lozano-Fernandez, J., Parry, L. A., Tarver, J. E., Pisani, D., and Donoghue, P. C. J. 2017.  
163 Uncertain-tree: discriminating among competing approaches to the phylogenetic analysis of

- 164 phenotype data. *Proceedings of the Royal Society of London B: Biological Sciences*,  
165 284(1846): 20162290.
- 166 Robinson, D. F. and Foulds, L. R. 1981. Comparison of phylogenetic trees. *Mathematical*  
167 *Biosciences*, 53(1-2): 131–147.
- 168 Ronquist, F., Teslenko, M., Van Der Mark, P., Ayres, D. L., Darling, A., Höhna, S., Larget, B.,  
169 Liu, L., Suchard, M. A., and Huelsenbeck, J. P. 2012. MrBayes 3.2: efficient Bayesian  
170 phylogenetic inference and model choice across a large model space. *Systematic Biology*,  
171 61(3): 539–542.
- 172 Sanderson, M. J. 1995. Objections to bootstrapping phylogenies: a critique. *Systematic Biology*,  
173 44(3): 299–320.
- 174 Stamatakis, A. 2014. RAxML version 8: a tool for phylogenetic analysis and post-analysis of  
175 large phylogenies. *Bioinformatics*, 30(9): 1312–1313.
- 176 Wright, A. M., Lloyd, G. T., and Hillis, D. M. 2016. Modeling character change heterogeneity in  
177 phylogenetic analyses of morphology through the use of priors. *Systematic Biology*, 65(4):  
178 602–611.
